# Supplementary material for: Formation of dialysis-free Kombucha-based bacterial nanocellulose embedded in a polypyrrole/PVA composite for bulk conductivity measurements
Source: Royal Society of Chemistry journal article supplement (doi:10.1039/d0ra04649c), 2020-01-01
Supplement: d0ra04649c1.pdf [file d0ra04649c1.pdf]

## Supplementary Information

### Formation of dialysis-free Kombucha-based bacterial nanocellulose embedded in a polypyrrole/PVA composite for bulk conductivity measurements

Nadia Nirmal, Michael N. Pillay, Marco Mariola, Francesco Petruccione, Werner E. van Zyl\*

School of Chemistry and Physics, University of KwaZulu-Natal, Westville Campus, Durban, 4000, South Africa

| CONTENTS                                                                        | PAGE |
|---------------------------------------------------------------------------------|------|
| Preparation of Nanocellulose from Bacterial Nanocellulose: Dialysis Method      | 2    |
| <b>Figure S1</b> Set-up of copper plates in apparatus for PPy@BNCC/PVA analysis | 2    |
| <b>Figure S2.</b> A photograph showing the conductivity apparatus and set-up.   | 3    |
| <b>Figure S3.</b> TEM image of an active SCOBY bacteria found in this study.    | 3    |
| <b>Figure S4.</b> Size distribution curves representing BNCC (dialysis-free).   | 4    |
| <b>Figure S5.</b> Size distribution curves representing BNCC (dialysis method). | 4    |
| <b>Figure S6.</b> The FT-IR spectrum of dialyzed BNCC sample.                   | 5    |
| <b>Figure S7.</b> FT-IR spectra for different PPy@BNCC samples.                 | 6    |
| Discussion of Figure S7.                                                        | 7    |
| <b>Figure S8.</b> Raman spectrum of dialyzed BNCC sample.                       | 8    |
| <b>Table S1.</b> Example of calculated mass, volume, and density of samples.    | 9    |
| <b>Table S2.</b> Measured current/A for PPy@BNCC/PVA (dialysis-free).           | 10   |
| <b>Table S3.</b> Measured current/A for PPy@BNCC/PVA (dialyzed method).         | 11   |

### Preparation of Nanocellulose from Bacterial Nanocellulose: Dialysis Method.

Followed the same procedure as described for the dialysis-free method described in the main text. After the 30 minute sonication step, the suspension was dialyzed to remove residual acid and hydrolysate of cellulose in the suspension whereby a dialysis sock was cut to size and the sample was filled in the tube. The result was monitored by checking the neutrality of the dialysate. After a five-day pH testing and water changing period, the water was measured to have a pH 6 and the dialysis ceased.

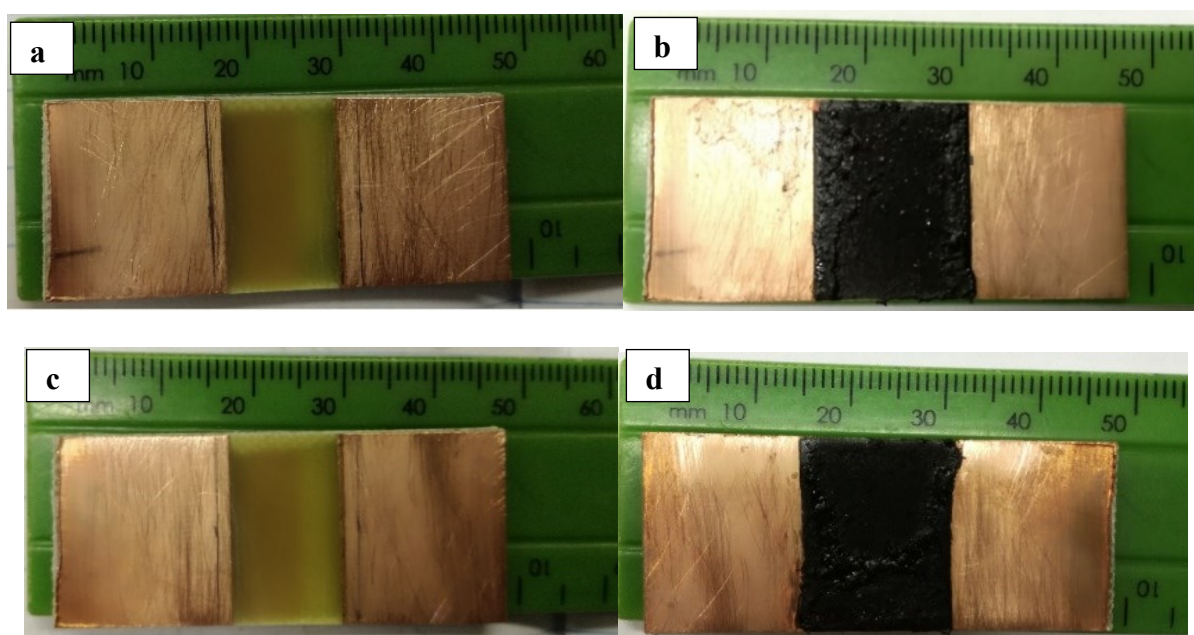

**Figure S1.** (a) The empty copper plate (b) the copper plate with PPy@BNCC/PVA from dialysis-free method (c) the empty copper plate (d) the copper plate with PPy@BNCC/PVA from dialysis method.

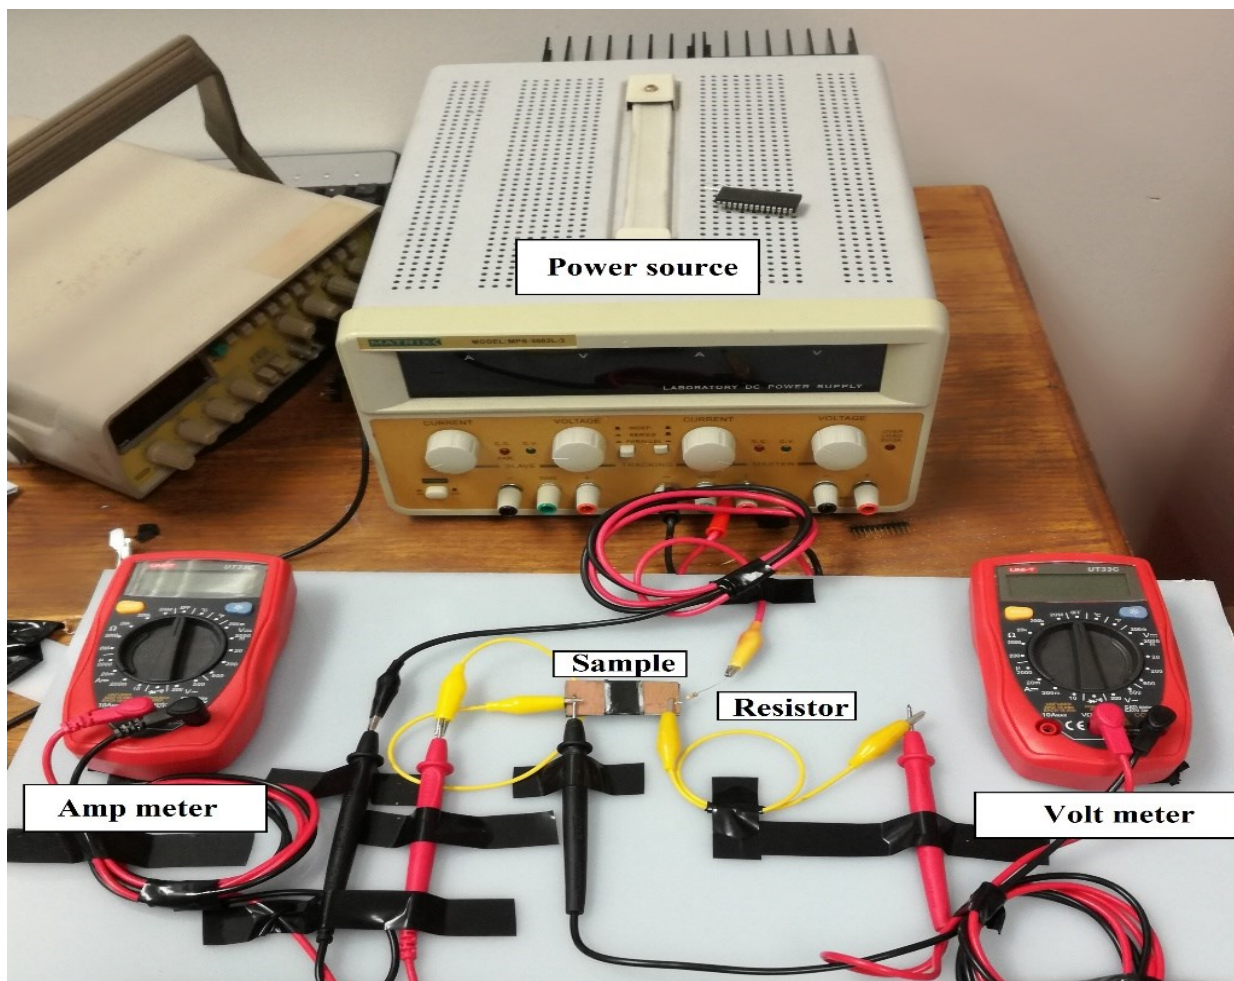

**Figure S2.** A photo showing the conductivity apparatus and set-up used in the study.

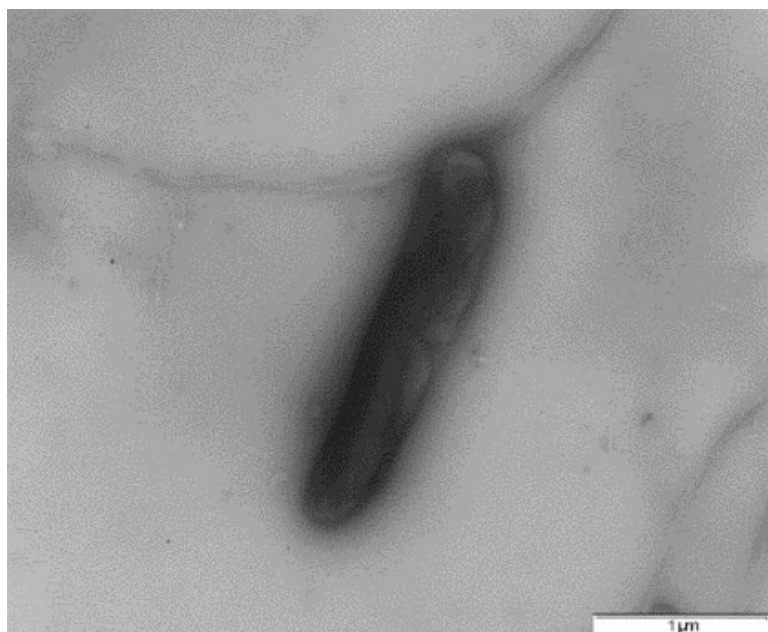

**Figure S3.** TEM image of an active SCOBY bacteria found in this study.

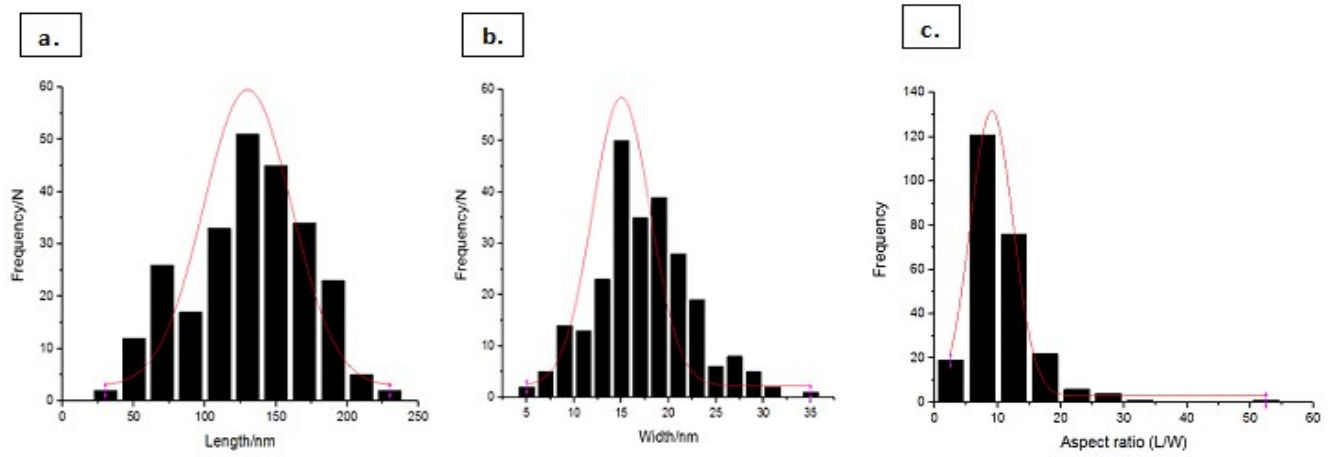

**Figure S4.** Size distribution curves representing the distribution of (a) average length, (b) width, and (c) aspect ratio of BNCC from dialysis-free method.

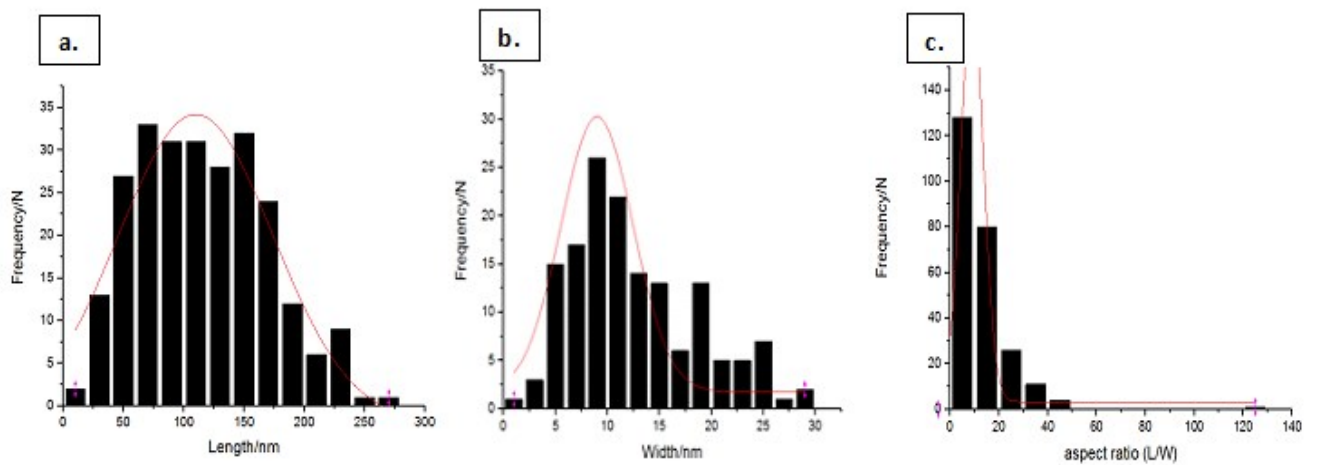

**Figure S5.** Size distribution curves representing the distribution of (a) average length, (b) width, and (c) aspect ratio of BNCC after dialysis.

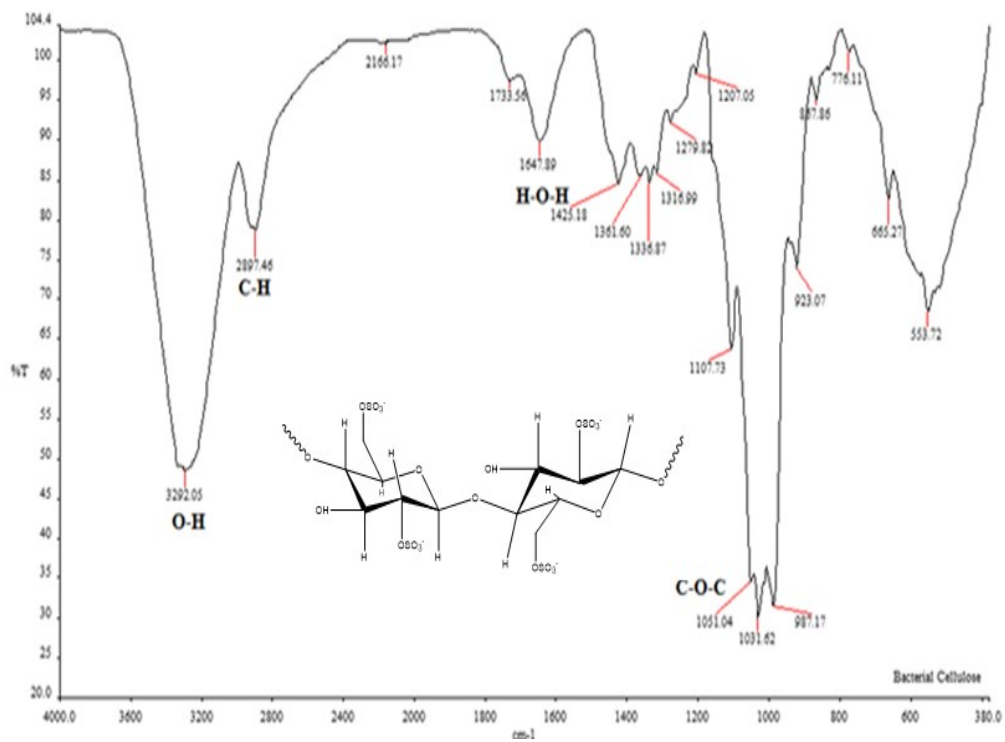

**Figure S6.** The FT-IR spectrum of dialyzed BNCC sample.

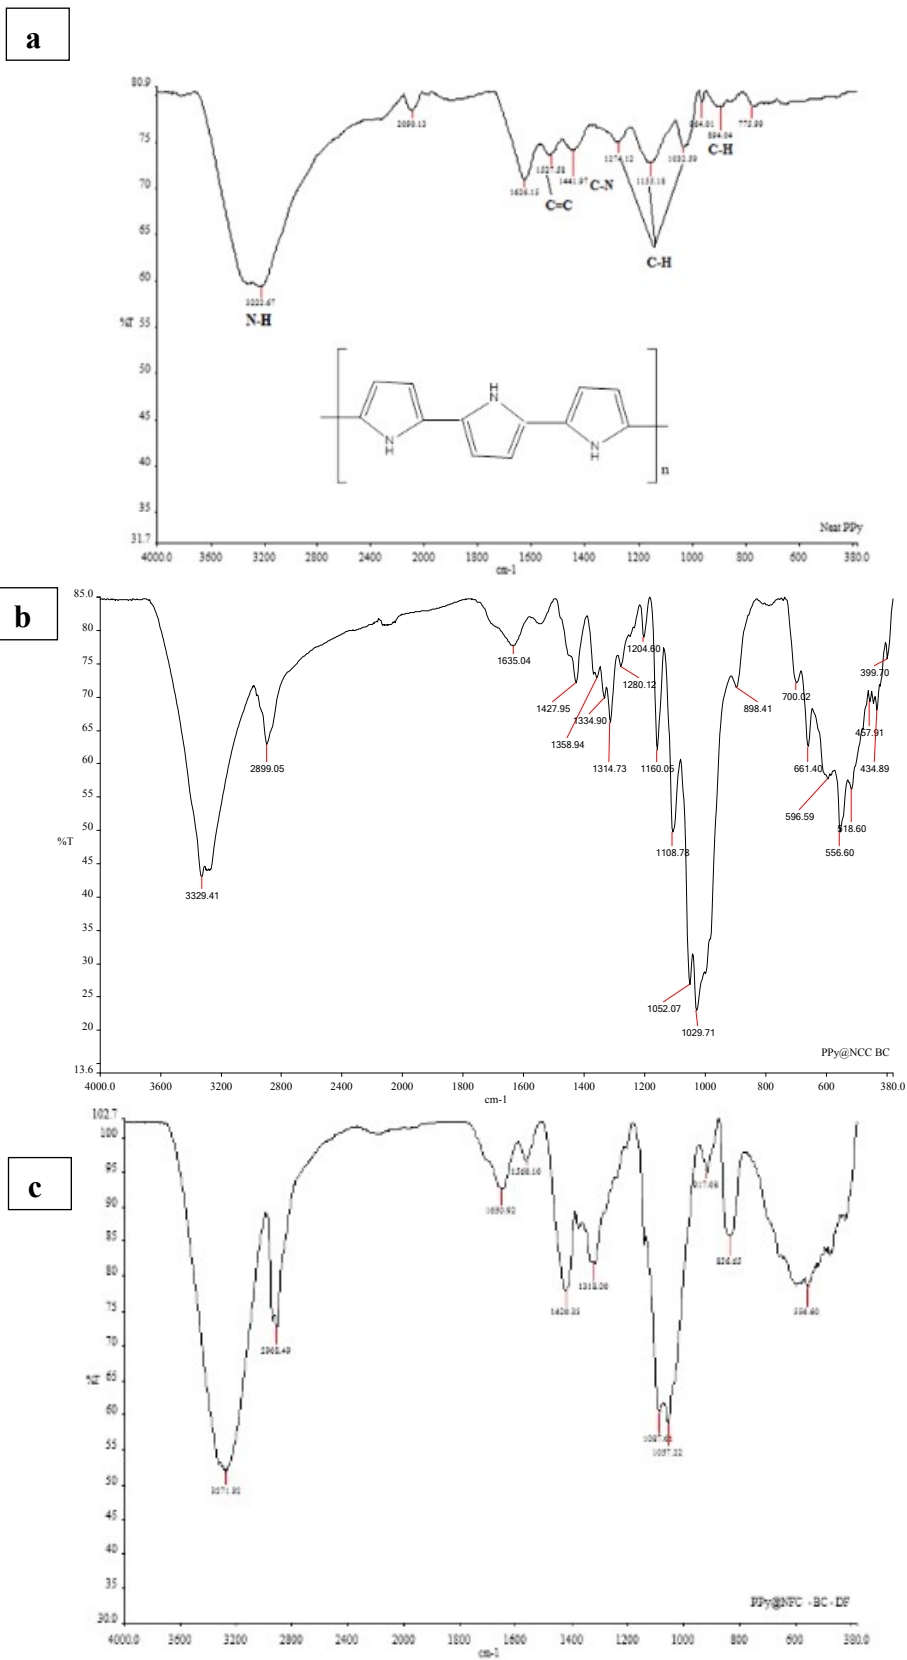

**Figure S7.** FT-IR spectra for (a) neat polypyrrole (b) PPy@BNCC (dialyzed) and (c) PPy@BNCC (dialysis-free).

FT-IR analysis was carried out to analyze the chemical structure of neat polypyrrole and PPy@BNCC nanocomposites. The characteristic bands of neat PPy is shown in Figure S7(a). The bands around 3222 and 1527  $\text{cm}^{-1}$  were assigned to the N-H stretching vibration and C-C ring stretching. The band at 1441  $\text{cm}^{-1}$  was assigned to the C-N stretching vibration in the pyrrole ring and bands at 1247, 1155, and 1032  $\text{cm}^{-1}$  to the C-H on-plane vibration, and the band at 894  $\text{cm}^{-1}$  to the C-H out-of-plane vibration.

The FT-IR for the dialyzed PPy@BNCC nanohybrid is shown in Figure S7(b) and dialysis-free method in Figure S7(c) and both exhibit very similar spectrums to that of neat PPy. However, all major peaks for PPy@BNCC have shifted wavenumbers with additional peaks attributed to the BNCC component, suggesting an interaction between PPy and nanocellulose. The FT-IR spectrum of PPy@BNCC nanocomposites appeared like a superposition of the FT-IR peaks of neat polypyrrole and nanocellulose. But the intensity of the O-H stretching band of BNCC and N-H stretching band of PPy decreased dramatically. On the other hand, peaks for BNCC and PPy in the nanocomposites shifted to lower wavenumbers compared to the neat BNCC and PPy. The results suggest that BNCC formed strong interfacial interactions with the polypyrrole, ascribed to the hydrogen bonding interaction between -OH and -NH moieties of BNCC and PPy, respectively.

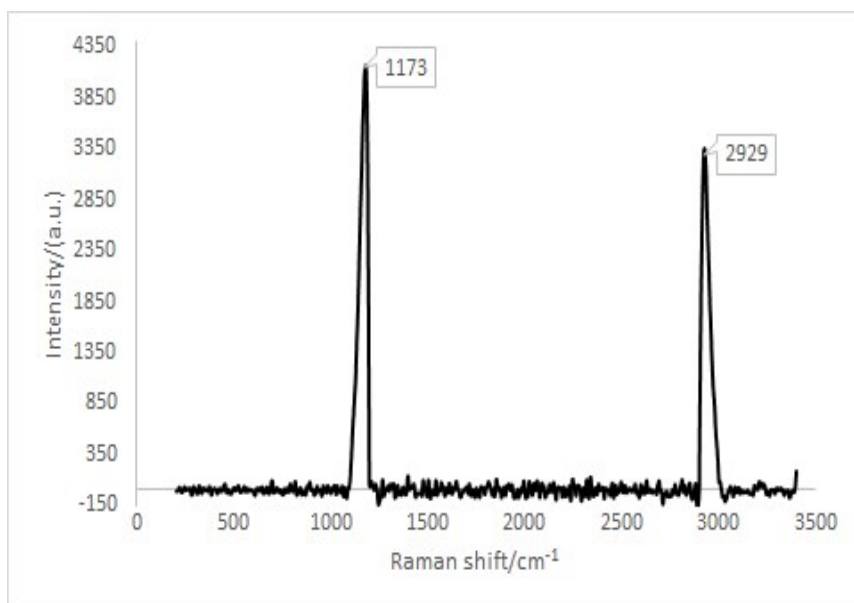

**Figure S8.** Raman spectrum of the dialyzed BNCC sample.



**Table S1.** Example of calculated mass, volume, and density of samples.

|                                               | <b>Dialysis method</b> | <b>Dialysis-free method</b> |
|-----------------------------------------------|------------------------|-----------------------------|
|                                               | PPy@BNCC/PVA           | PPy@BNCC/PVA                |
| Mass of empty Cu plate/g                      | 3.103                  | 3.185                       |
| Mass of wet sample + Cu plate/g               | 3.182                  | 3.262                       |
| Mass of wet sample/g                          | 0.079                  | 0.077                       |
| Mass of dry PPy@BNCC in PVA + Cu plate/g      | 3.140                  | 3.221                       |
| Mass of dry PPy@BNCC in PVA/g                 | 0.037                  | 0.036                       |
| Mass of water/g                               | 0.042                  | 0.041                       |
| Volume of water/mL                            | 0.042                  | 0.041                       |
| Volume of PPy@BNCC in PVA/mL                  | 0.208                  | 0.209                       |
| Density of PPy@BNCC in PVA/g.mL <sup>-1</sup> | 0.178                  | 0.172                       |
| Volume of PPy@BNCC in PVA/mm <sup>3</sup>     | 208                    | 209                         |
| Top surface area of film/mm <sup>2</sup>      | 347.314                | 364.660                     |
| Thickness of dry PPy@BNCC in PVA film/mm      | 0.599                  | 0.573                       |

**Table S2.** Measured current/A for PPy@BNCC/PVA (dialysis-free method), at applied voltage/V with calculated resistance.

| <b>Voltage/V</b> | <b>Current/A</b>             | <b>Resistance/<math>\Omega</math></b> |
|------------------|------------------------------|---------------------------------------|
| 2.5              | 0.0016                       | 1562.50                               |
| 3                | 0.0018                       | 1666.67                               |
| 3.5              | 0.0020                       | 1750.00                               |
| 4.5              | 0.0024                       | 1875.00                               |
| 5.5              | 0.0025                       | 2200.00                               |
| 6.5              | 0.0029                       | 2241.38                               |
| 7.5              | 0.0033                       | 2272.73                               |
| 8.5              | 0.0036                       | 2361.11                               |
| 9.5              | 0.0040                       | 2375.00                               |
| 10.5             | 0.0043                       | 2441.86                               |
| 11.5             | 0.0047                       | 2446.81                               |
| 12.5             | 0.005                        | 2500.00                               |
| 13.5             | 0.0053                       | 2547.17                               |
| 14.5             | 0.0057                       | 2543.86                               |
| 15.5             | 0.0060                       | 2583.33                               |
| 16.5             | 0.0063                       | 2619.05                               |
| 17.5             | 0.0067                       | 2611.94                               |
| 18.5             | 0.0068                       | 2720.59                               |
| 19.5             | 0.0071                       | 2746.48                               |
| 20.5             | 0.0075                       | 2733.33                               |
|                  | Average resistance/ $\Omega$ | 2339.94                               |

**Table S3.** Measured current/A for PPy@BNCC/PVA (Dialyzed method), at applied voltage/V with calculated resistance.

| <b>Voltage/V</b> | <b>Current/A</b>             | <b>Resistance/<math>\Omega</math></b> |
|------------------|------------------------------|---------------------------------------|
| 2.5              | 0.0010                       | 2500.00                               |
| 3                | 0.0011                       | 2727.27                               |
| 3.5              | 0.0013                       | 2692.31                               |
| 4.5              | 0.0016                       | 2812.50                               |
| 5.5              | 0.0019                       | 2894.74                               |
| 6.5              | 0.0022                       | 2954.55                               |
| 7.5              | 0.0025                       | 3000.00                               |
| 8.5              | 0.0028                       | 3035.71                               |
| 9.5              | 0.0031                       | 3064.52                               |
| 10.5             | 0.0034                       | 3088.24                               |
| 11.5             | 0.0036                       | 3194.44                               |
| 12.5             | 0.0039                       | 3205.13                               |
| 13.5             | 0.0042                       | 3214.29                               |
| 14.5             | 0.0045                       | 3222.22                               |
| 15.5             | 0.0047                       | 3297.87                               |
| 16.5             | 0.0050                       | 3300.00                               |
| 17.5             | 0.0052                       | 3365.38                               |
| 18.5             | 0.0055                       | 3363.64                               |
| 19.5             | 0.0058                       | 3362.07                               |
| 20.5             | 0.0058                       | 3534.48                               |
|                  | Average resistance/ $\Omega$ | 3091.47                               |
